# Supplementary material for: Comparative analysis of chloroplast genomes of 29 tomato germplasms: genome structures, phylogenetic relationships, and adaptive evolution
Source: PubMed Central journal article supplement (PMC10203424; doi:10.3389/fpls.2023.1179009), 2023-05-09

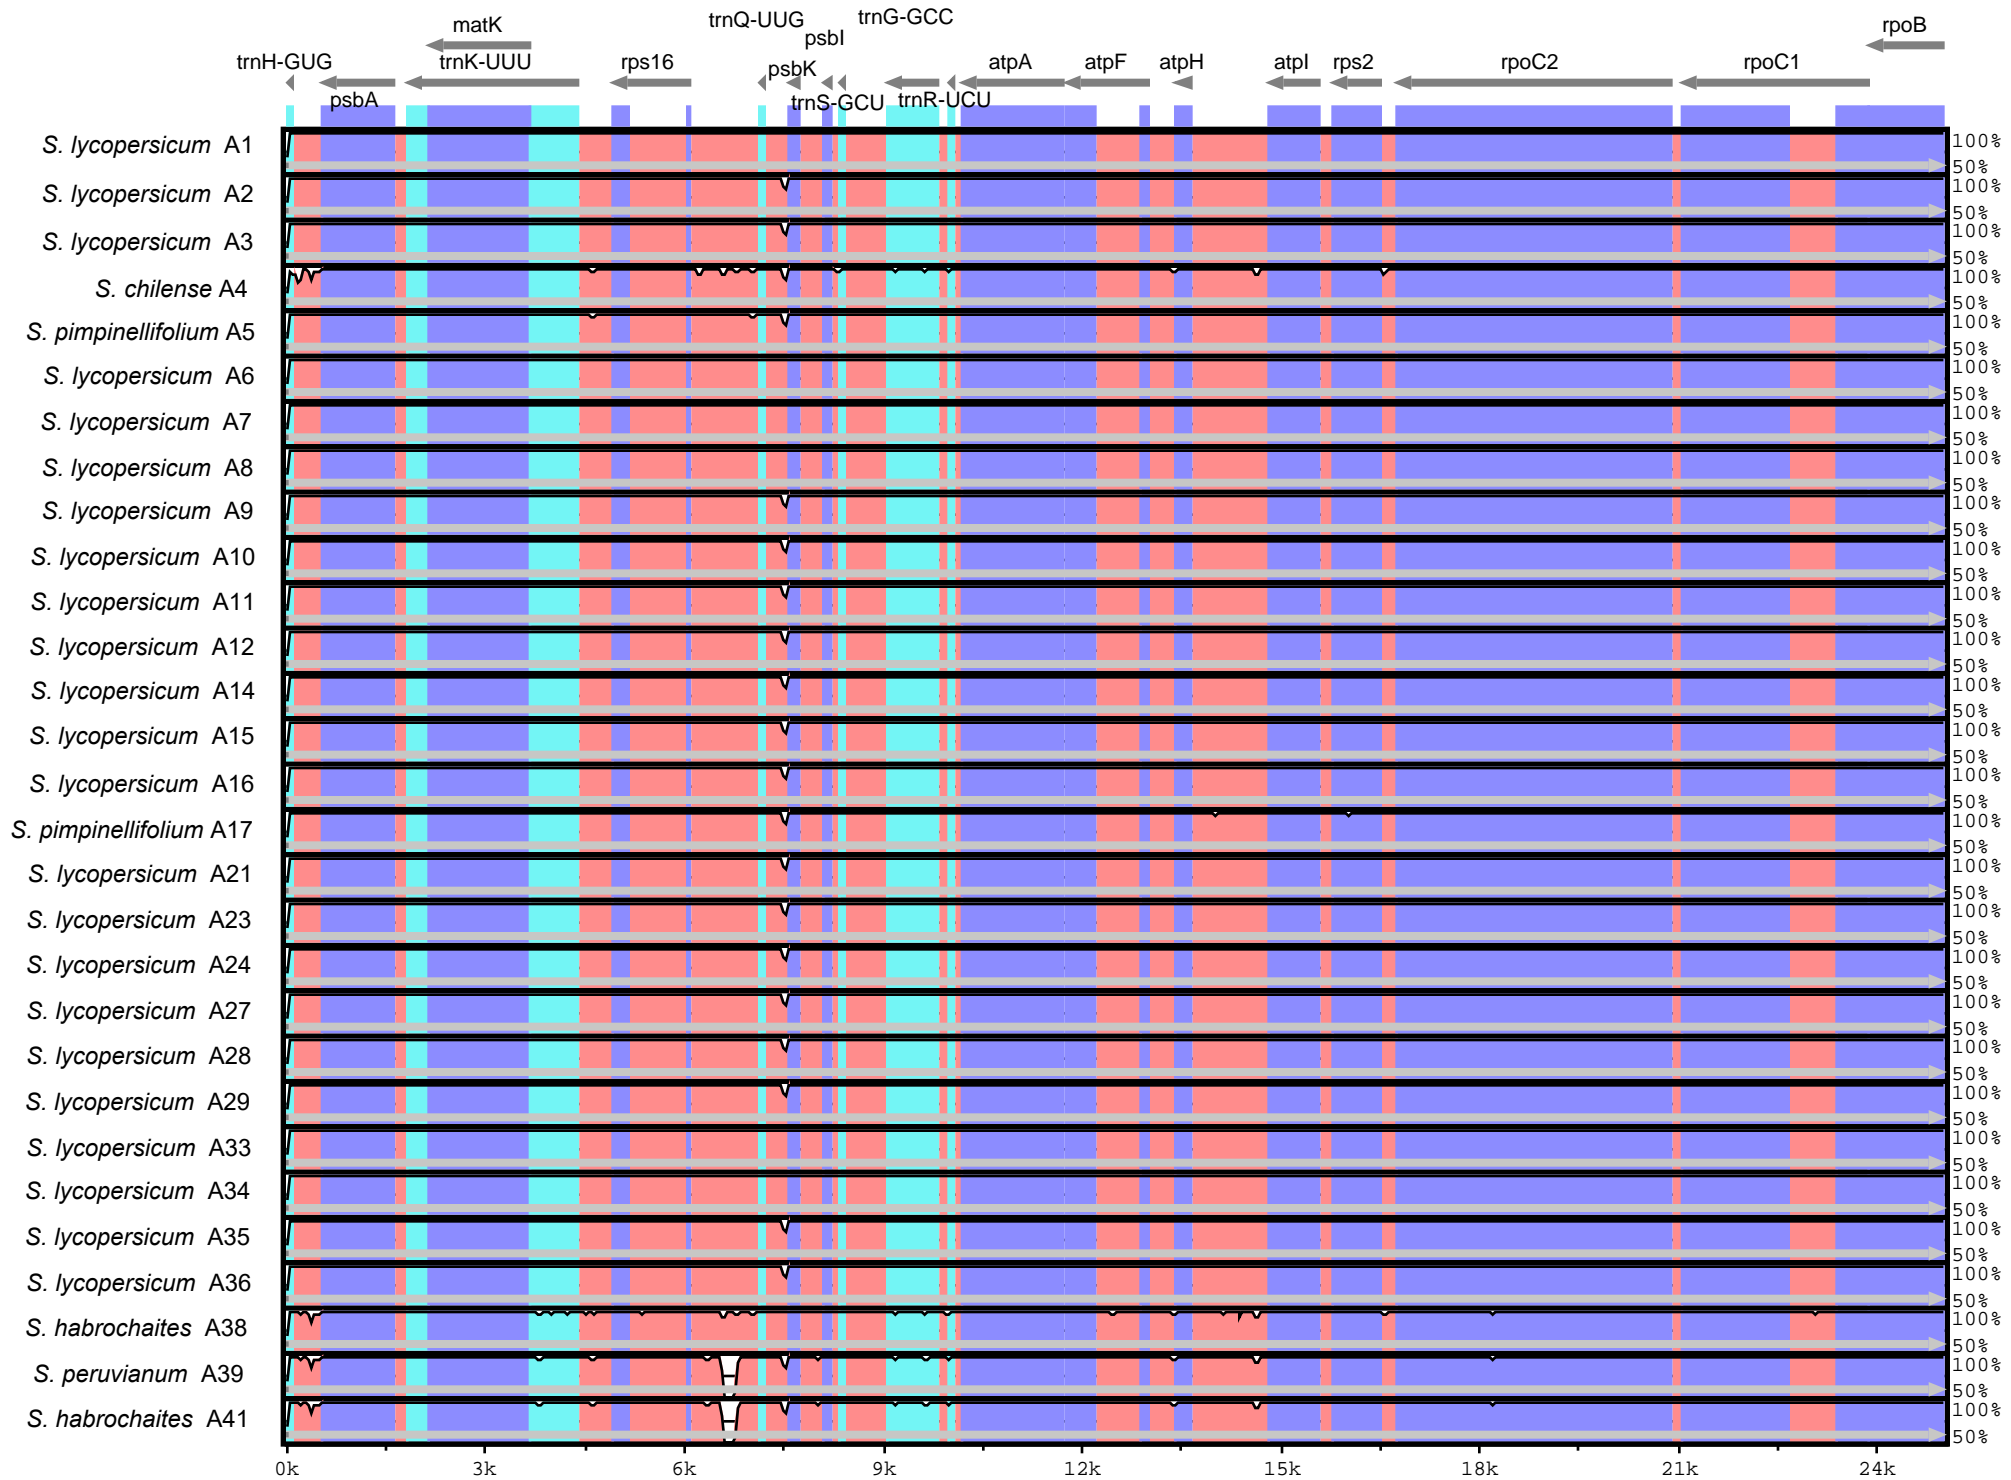





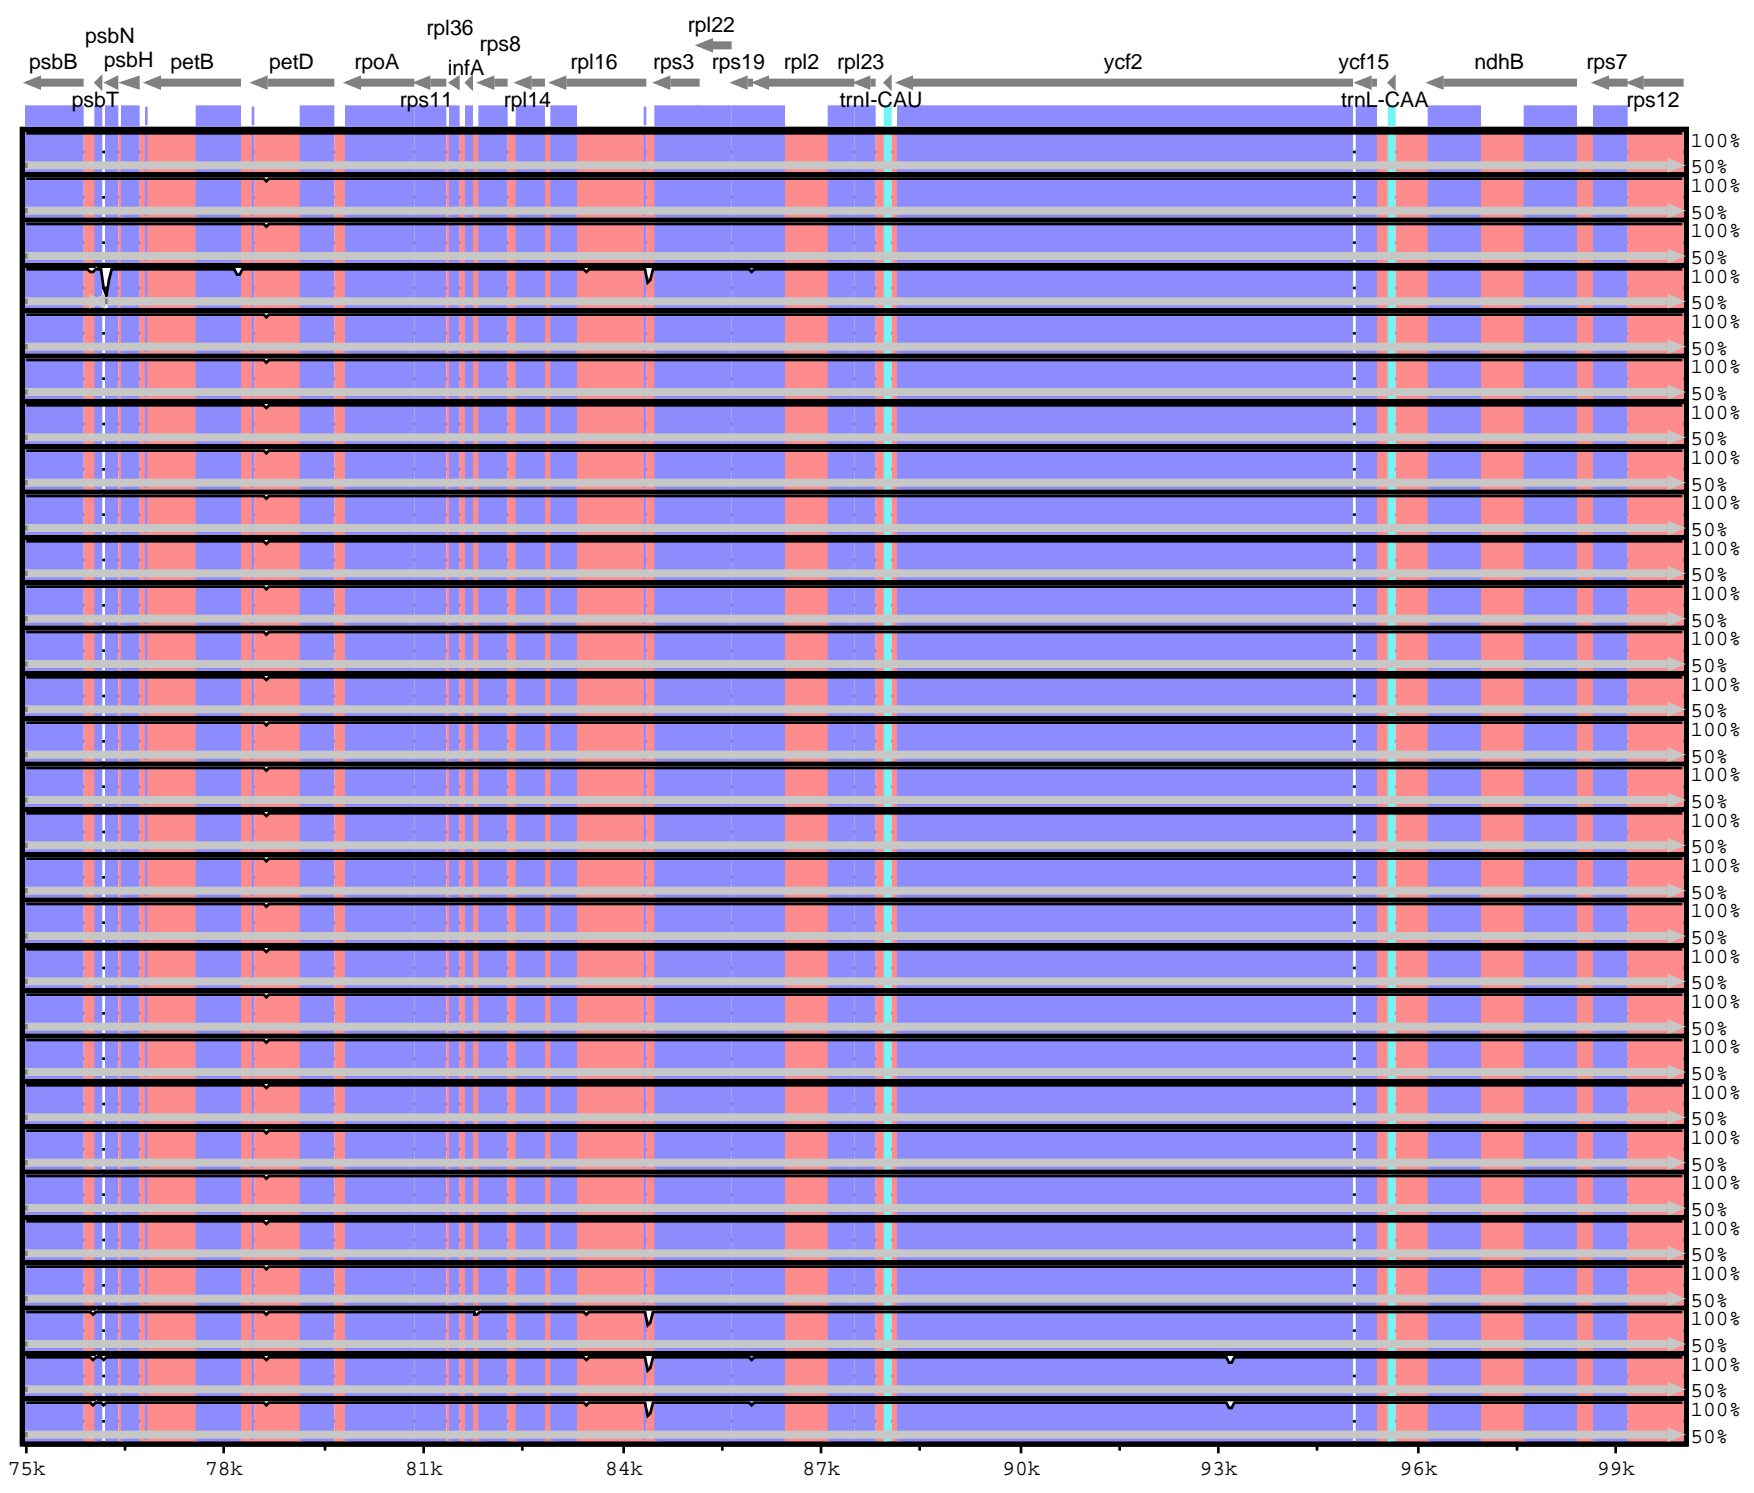

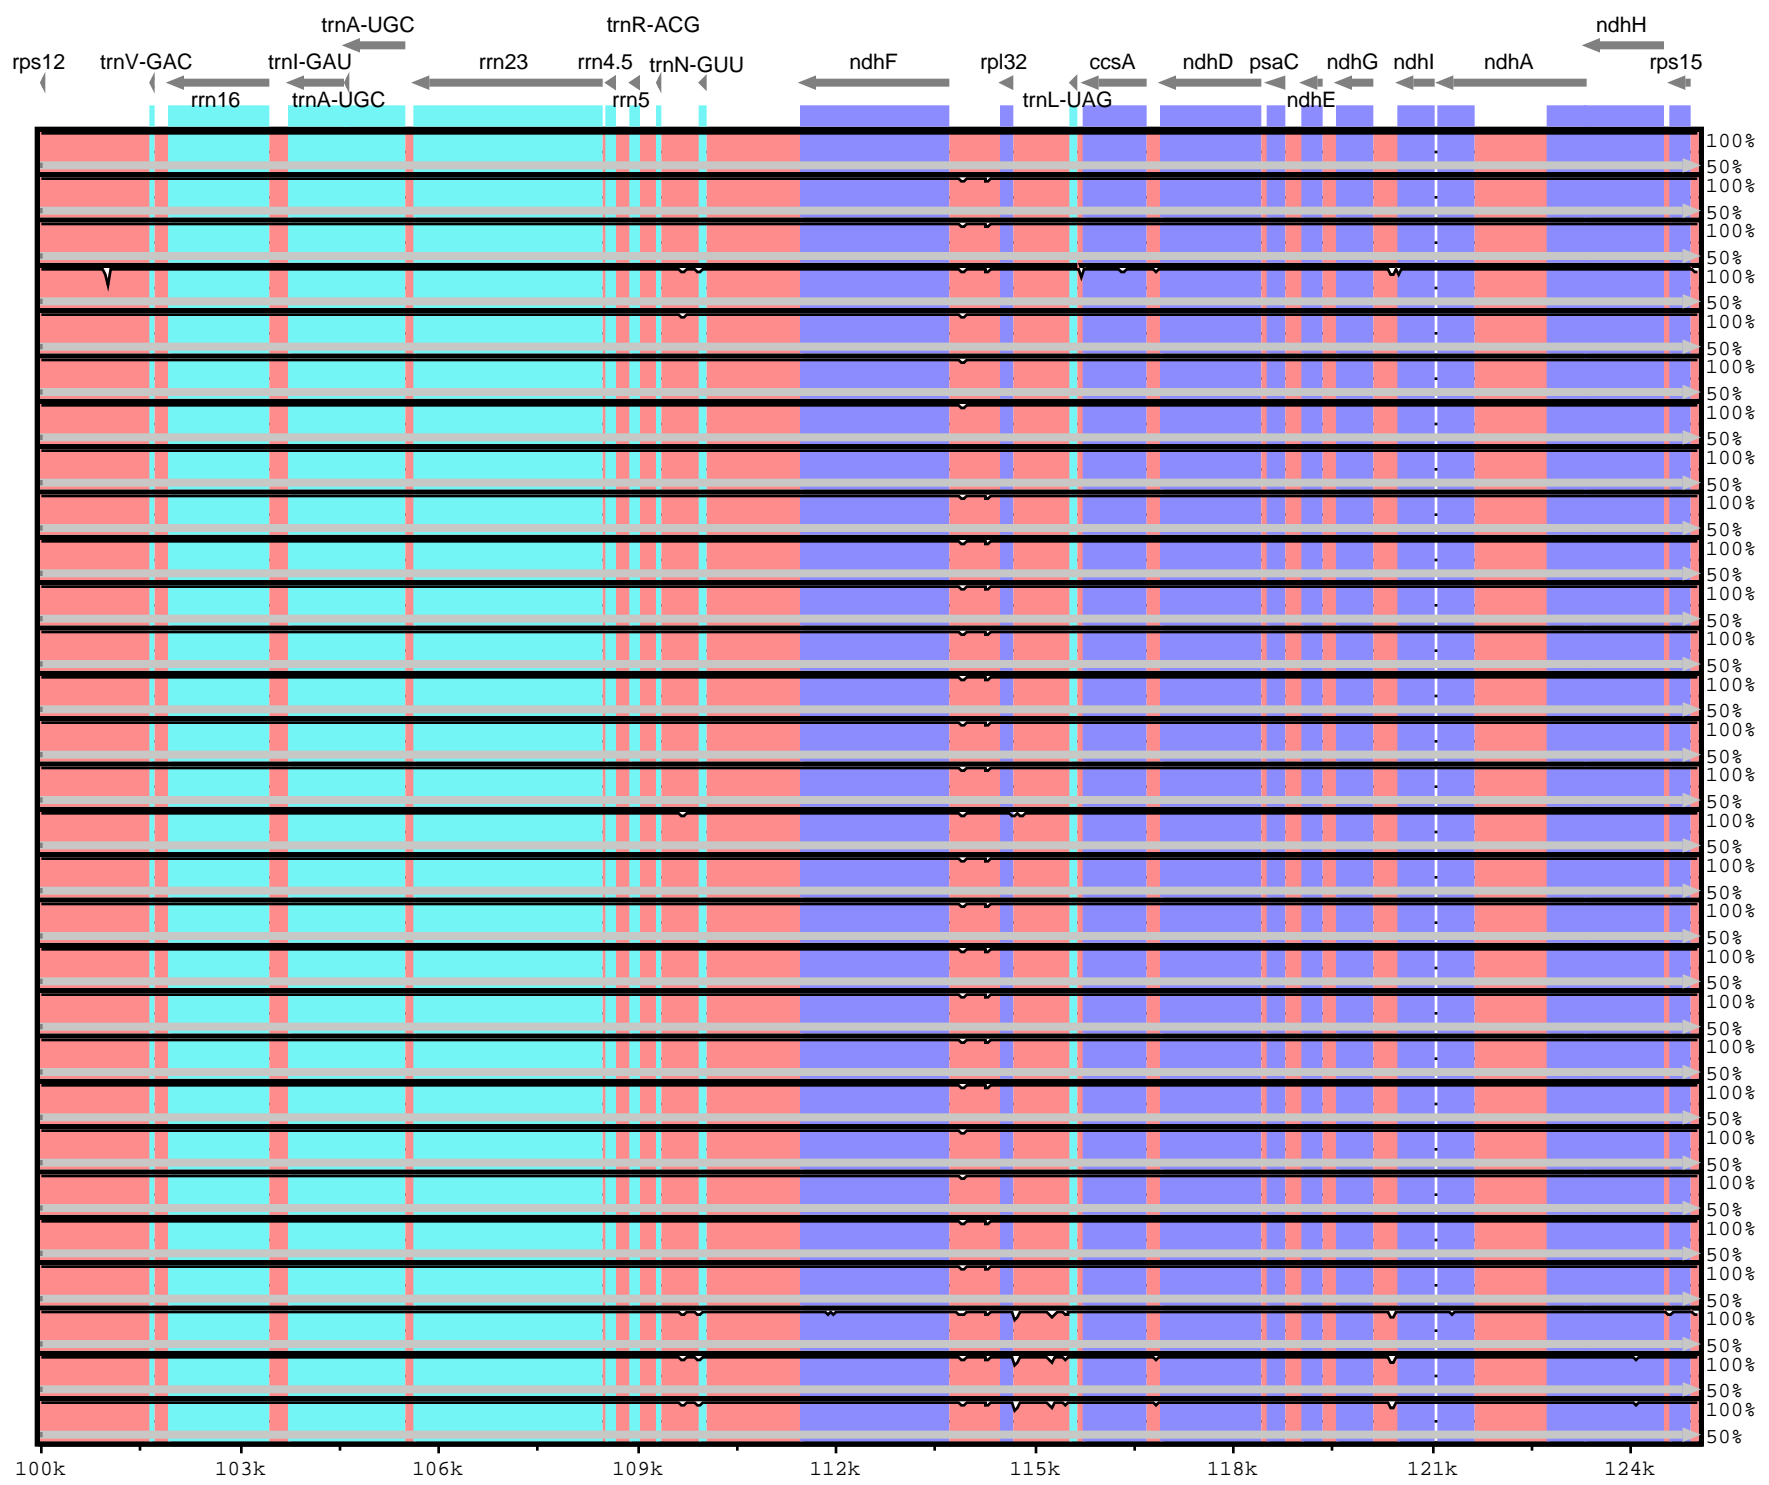

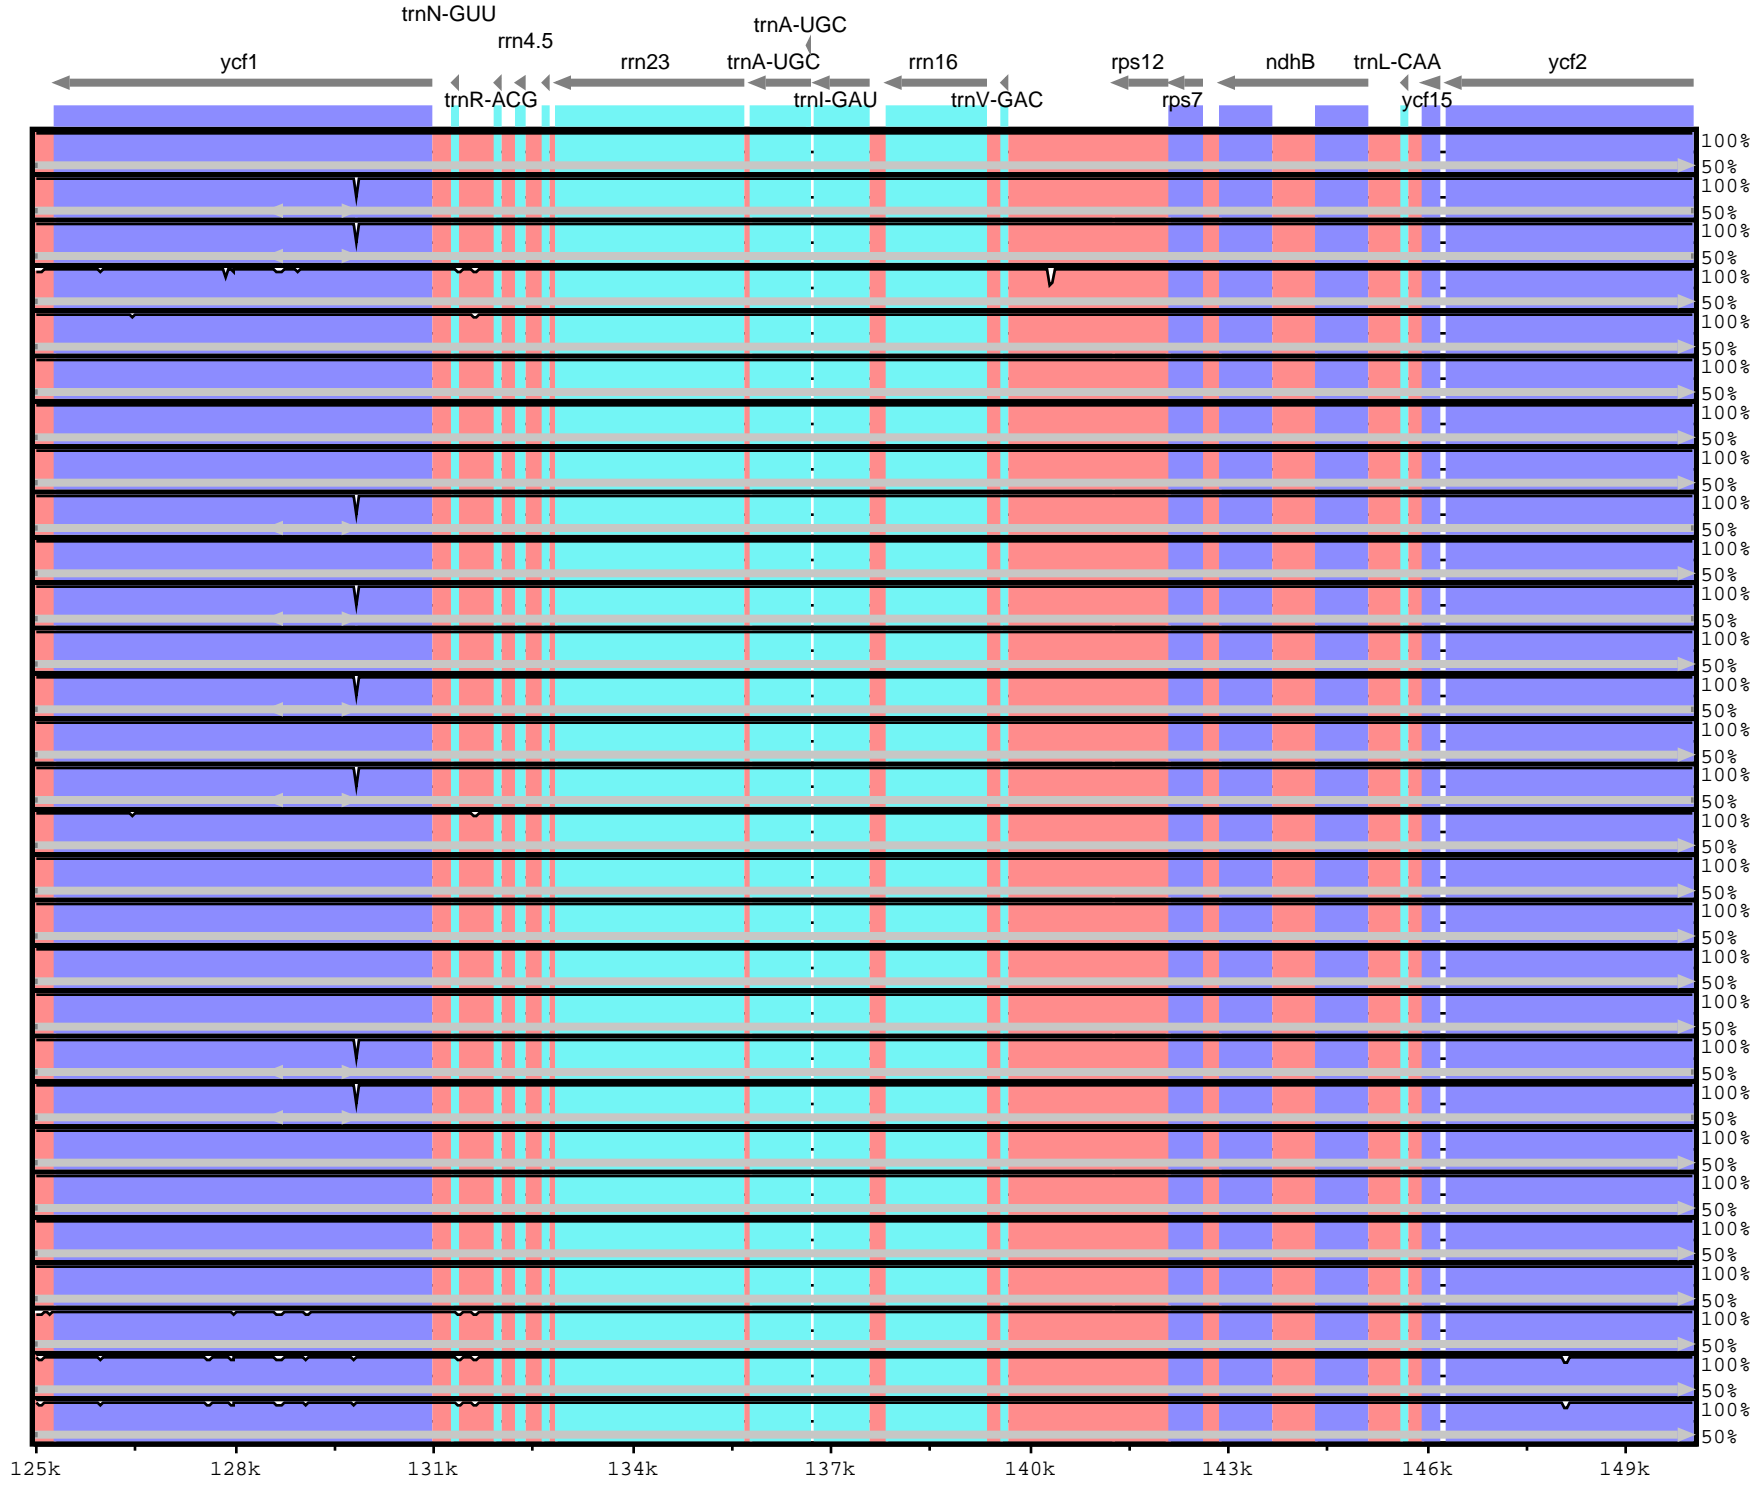

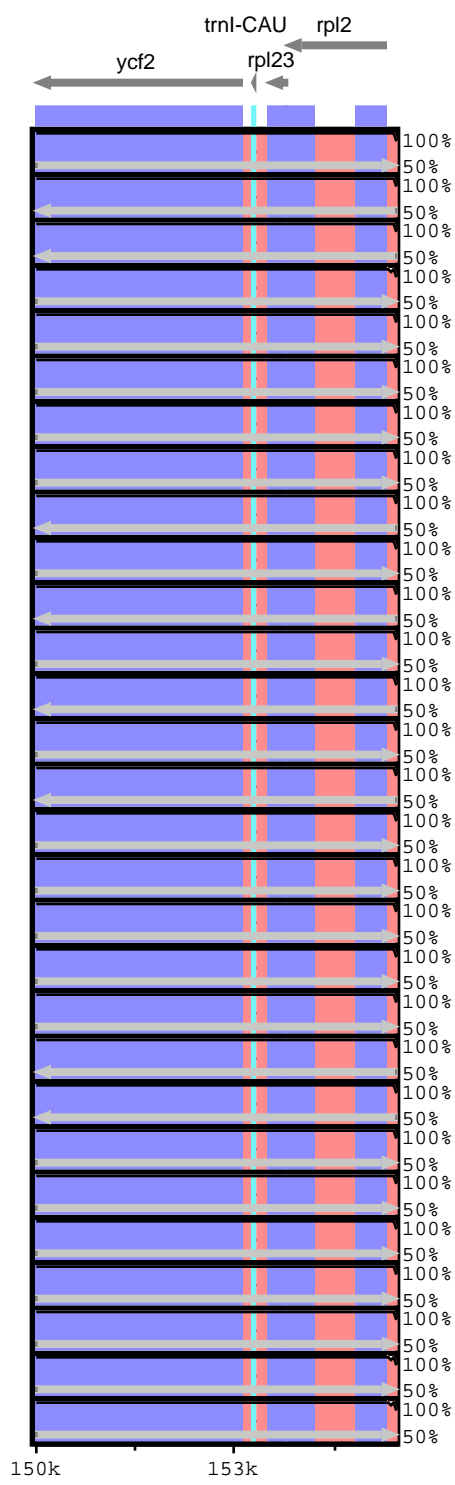

Supplement: Image_1.pdf [file Image_1.pdf]
