# Supplementary material for: Comparative analysis of chloroplast genomes of 29 tomato germplasms: genome structures, phylogenetic relationships, and adaptive evolution
Source: Front Plant Sci. 2023 May 9;14:1179009. doi: 10.3389/fpls.2023.1179009 (PMC10203424; doi:10.3389/fpls.2023.1179009)
Supplement: Supplementary file 5 [file Table_3.xlsx]

## Sheet: Sheet1
Supplementary Table 3. The relative synonymous codon usage (RSCU) in the tomato chloroplast genomes.
Amino acid	Codon	A1		A2		A3		A4		A5		A6		A7		A8		A9		A10		A11		A12		A14		A15		A16		A17		A21		A23		A24		A27		A28		A29		A33		A34
		Number	RSCU	Number	RSCU	Number	RSCU	Number	RSCU	Number	RSCU	Number	RSCU	Number	RSCU	Number	RSCU	Number	RSCU	Number	RSCU	Number	RSCU	Number	RSCU	Number	RSCU	Number	RSCU	Number	RSCU	Number	RSCU	Number	RSCU	Number	RSCU	Number	RSCU	Number	RSCU	Number	RSCU	Number	RSCU	Number	RSCU	Number	RSCU
Phe	TTT	854	1.32	854	1.33	854	1.33	856	1.33	853	1.32	854	1.32	854	1.32	854	1.32	854	1.33	854	1.33	854	1.33	854	1.33	854	1.33	854	1.33	854	1.33	853	1.32	854	1.33	854	1.33	854	1.33	854	1.33	854	1.33	854	1.33	854	1.32	854	1.32
	TTC	436	0.68	435	0.67	435	0.67	436	0.67	436	0.68	436	0.68	436	0.68	436	0.68	435	0.67	435	0.67	435	0.67	435	0.67	435	0.67	435	0.67	435	0.67	436	0.68	435	0.67	435	0.67	435	0.67	435	0.67	435	0.67	435	0.67	436	0.68	436	0.68
Leu	TTA	784	1.92	784	1.92	784	1.92	783	1.93	784	1.93	784	1.92	784	1.92	784	1.92	784	1.92	784	1.92	784	1.92	784	1.92	784	1.92	784	1.92	784	1.92	783	1.92	784	1.92	784	1.92	784	1.92	784	1.92	784	1.92	784	1.92	784	1.92	784	1.92
	TTG	497	1.22	497	1.22	497	1.22	497	1.22	497	1.22	497	1.22	497	1.22	497	1.22	497	1.22	497	1.22	497	1.22	497	1.22	497	1.22	497	1.22	497	1.22	498	1.22	497	1.22	497	1.22	497	1.22	497	1.22	497	1.22	497	1.22	497	1.22	497	1.22
	CTT	520	1.28	520	1.28	520	1.28	518	1.27	519	1.27	520	1.28	520	1.28	520	1.28	520	1.28	520	1.28	520	1.28	520	1.28	520	1.28	520	1.28	520	1.28	519	1.27	520	1.28	520	1.28	520	1.28	520	1.28	520	1.28	520	1.28	520	1.28	520	1.28
	CTC	158	0.39	158	0.39	158	0.39	157	0.39	158	0.39	158	0.39	158	0.39	158	0.39	158	0.39	158	0.39	158	0.39	158	0.39	158	0.39	158	0.39	158	0.39	158	0.39	158	0.39	158	0.39	158	0.39	158	0.39	158	0.39	158	0.39	158	0.39	158	0.39
	CTA	329	0.81	329	0.81	329	0.81	326	0.8	328	0.81	329	0.81	329	0.81	329	0.81	329	0.81	329	0.81	329	0.81	329	0.81	329	0.81	329	0.81	329	0.81	329	0.81	329	0.81	329	0.81	329	0.81	329	0.81	329	0.81	329	0.81	329	0.81	329	0.81
	CTG	157	0.39	157	0.39	157	0.39	158	0.39	157	0.39	157	0.39	157	0.39	157	0.39	157	0.39	157	0.39	157	0.39	157	0.39	157	0.39	157	0.39	157	0.39	157	0.39	157	0.39	157	0.39	157	0.39	157	0.39	157	0.39	157	0.39	157	0.39	157	0.39
Ile	ATT	965	1.49	965	1.49	965	1.49	963	1.49	965	1.49	965	1.49	965	1.49	965	1.49	965	1.49	965	1.49	965	1.49	965	1.49	965	1.49	965	1.49	965	1.49	965	1.49	965	1.49	965	1.49	965	1.49	965	1.49	965	1.49	965	1.49	965	1.49	965	1.49
	ATC	385	0.6	385	0.6	385	0.6	387	0.6	385	0.59	385	0.6	385	0.6	385	0.6	385	0.6	385	0.6	385	0.6	385	0.6	385	0.6	385	0.6	385	0.6	385	0.6	385	0.6	385	0.6	385	0.6	385	0.6	385	0.6	385	0.6	385	0.6	385	0.6
	ATA	591	0.91	591	0.91	591	0.91	593	0.92	592	0.91	591	0.91	591	0.91	591	0.91	591	0.91	591	0.91	591	0.91	591	0.91	591	0.91	591	0.91	591	0.91	591	0.91	591	0.91	591	0.91	591	0.91	591	0.91	591	0.91	591	0.91	591	0.91	591	0.91
Met	ATG	536	1	536	1	536	1	535	1	536	1	536	1	536	1	536	1	536	1	536	1	536	1	536	1	536	1	536	1	536	1	535	1	536	1	536	1	536	1	536	1	536	1	536	1	536	1	536	1
Val	GTT	486	1.51	486	1.51	486	1.51	489	1.51	488	1.51	486	1.51	486	1.51	486	1.51	486	1.51	486	1.51	486	1.51	486	1.51	486	1.51	486	1.51	486	1.51	488	1.51	486	1.51	486	1.51	486	1.51	486	1.51	486	1.51	486	1.51	486	1.51	486	1.51
	GTC	153	0.47	154	0.48	154	0.48	153	0.47	154	0.48	153	0.47	153	0.47	153	0.47	154	0.48	154	0.48	154	0.48	154	0.48	154	0.48	154	0.48	154	0.48	154	0.48	154	0.48	154	0.48	154	0.48	154	0.48	154	0.48	154	0.48	153	0.47	153	0.47
	GTA	486	1.51	486	1.51	486	1.51	484	1.5	485	1.5	486	1.51	486	1.51	486	1.51	486	1.51	486	1.51	486	1.51	486	1.51	486	1.51	486	1.51	486	1.51	485	1.5	486	1.51	486	1.51	486	1.51	486	1.51	486	1.51	486	1.51	486	1.51	486	1.51
	GTG	164	0.51	164	0.51	164	0.51	166	0.51	164	0.51	164	0.51	164	0.51	164	0.51	164	0.51	164	0.51	164	0.51	164	0.51	164	0.51	164	0.51	164	0.51	164	0.51	164	0.51	164	0.51	164	0.51	164	0.51	164	0.51	164	0.51	164	0.51	164	0.51
Ser	TCT	494	1.72	494	1.72	494	1.72	494	1.71	494	1.72	494	1.72	494	1.72	494	1.72	494	1.72	494	1.72	494	1.72	494	1.72	494	1.72	494	1.72	494	1.72	493	1.72	494	1.72	494	1.72	494	1.72	494	1.72	494	1.72	494	1.72	494	1.72	494	1.72
	TCC	260	0.91	260	0.91	260	0.91	262	0.91	262	0.91	260	0.91	260	0.91	260	0.91	260	0.91	260	0.91	260	0.91	260	0.91	260	0.91	260	0.91	260	0.91	262	0.91	260	0.91	260	0.91	260	0.91	260	0.91	260	0.91	260	0.91	260	0.91	260	0.91
	TCA	338	1.18	338	1.18	338	1.18	340	1.18	339	1.18	338	1.18	338	1.18	338	1.18	338	1.18	338	1.18	338	1.18	338	1.18	338	1.18	338	1.18	338	1.18	338	1.18	338	1.18	338	1.18	338	1.18	338	1.18	338	1.18	338	1.18	338	1.18	338	1.18
	TCG	173	0.6	173	0.6	173	0.6	171	0.59	170	0.59	173	0.6	173	0.6	173	0.6	173	0.6	173	0.6	173	0.6	173	0.6	173	0.6	173	0.6	173	0.6	171	0.6	173	0.6	173	0.6	173	0.6	173	0.6	173	0.6	173	0.6	173	0.6	173	0.6
Pro	CCT	373	1.54	373	1.54	373	1.54	374	1.55	373	1.54	373	1.54	373	1.54	373	1.54	373	1.54	373	1.54	373	1.54	373	1.54	373	1.54	373	1.54	373	1.54	372	1.54	373	1.54	373	1.54	373	1.54	373	1.54	373	1.54	373	1.54	373	1.54	373	1.54
	CCC	177	0.73	177	0.73	177	0.73	178	0.74	178	0.73	177	0.73	177	0.73	177	0.73	177	0.73	177	0.73	177	0.73	177	0.73	177	0.73	177	0.73	177	0.73	179	0.74	177	0.73	177	0.73	177	0.73	177	0.73	177	0.73	177	0.73	177	0.73	177	0.73
	CCA	288	1.19	288	1.19	288	1.19	287	1.19	287	1.18	288	1.19	288	1.19	288	1.19	288	1.19	288	1.19	288	1.19	288	1.19	288	1.19	288	1.19	288	1.19	287	1.18	288	1.19	288	1.19	288	1.19	288	1.19	288	1.19	288	1.19	288	1.19	288	1.19
	CCG	131	0.54	131	0.54	131	0.54	129	0.53	131	0.54	131	0.54	131	0.54	131	0.54	131	0.54	131	0.54	131	0.54	131	0.54	131	0.54	131	0.54	131	0.54	131	0.54	131	0.54	131	0.54	131	0.54	131	0.54	131	0.54	131	0.54	131	0.54	131	0.54
Thr	ACT	469	1.58	469	1.58	469	1.58	467	1.57	468	1.57	469	1.58	469	1.58	469	1.58	469	1.58	469	1.58	469	1.58	469	1.58	469	1.58	469	1.58	469	1.58	468	1.57	469	1.58	469	1.58	469	1.58	469	1.58	469	1.58	469	1.58	469	1.58	469	1.58
	ACC	235	0.79	235	0.79	235	0.79	232	0.78	235	0.79	235	0.79	235	0.79	235	0.79	235	0.79	235	0.79	235	0.79	235	0.79	235	0.79	235	0.79	235	0.79	235	0.79	235	0.79	235	0.79	235	0.79	235	0.79	235	0.79	235	0.79	235	0.79	235	0.79
	ACA	359	1.21	359	1.21	359	1.21	360	1.21	359	1.21	359	1.21	359	1.21	359	1.21	359	1.21	359	1.21	359	1.21	359	1.21	359	1.21	359	1.21	359	1.21	359	1.21	359	1.21	359	1.21	359	1.21	359	1.21	359	1.21	359	1.21	359	1.21	359	1.21
	ACG	128	0.43	128	0.43	128	0.43	131	0.44	128	0.43	128	0.43	128	0.43	128	0.43	128	0.43	128	0.43	128	0.43	128	0.43	128	0.43	128	0.43	128	0.43	128	0.43	128	0.43	128	0.43	128	0.43	128	0.43	128	0.43	128	0.43	128	0.43	128	0.43
Ala	GCT	572	1.77	572	1.77	572	1.77	574	1.78	574	1.78	572	1.77	572	1.77	572	1.77	572	1.77	572	1.77	572	1.77	572	1.77	572	1.77	572	1.77	572	1.77	574	1.78	572	1.77	572	1.77	572	1.77	572	1.77	572	1.77	572	1.77	572	1.77	572	1.77
	GCC	226	0.7	226	0.7	226	0.7	225	0.7	225	0.7	226	0.7	226	0.7	226	0.7	226	0.7	226	0.7	226	0.7	226	0.7	226	0.7	226	0.7	226	0.7	225	0.7	226	0.7	226	0.7	226	0.7	226	0.7	226	0.7	226	0.7	226	0.7	226	0.7
	GCA	368	1.14	368	1.14	368	1.14	367	1.14	368	1.14	368	1.14	368	1.14	368	1.14	368	1.14	368	1.14	368	1.14	368	1.14	368	1.14	368	1.14	368	1.14	368	1.14	368	1.14	368	1.14	368	1.14	368	1.14	368	1.14	368	1.14	368	1.14	368	1.14
	GCG	126	0.39	126	0.39	126	0.39	126	0.39	126	0.39	126	0.39	126	0.39	126	0.39	126	0.39	126	0.39	126	0.39	126	0.39	126	0.39	126	0.39	126	0.39	126	0.39	126	0.39	126	0.39	126	0.39	126	0.39	126	0.39	126	0.39	126	0.39	126	0.39
Tyr	TAT	673	1.6	673	1.6	673	1.6	674	1.6	673	1.6	673	1.6	673	1.6	673	1.6	673	1.6	673	1.6	673	1.6	673	1.6	673	1.6	673	1.6	673	1.6	673	1.6	673	1.6	673	1.6	673	1.6	673	1.6	673	1.6	673	1.6	673	1.6	673	1.6
	TAC	169	0.4	169	0.4	169	0.4	169	0.4	169	0.4	169	0.4	169	0.4	169	0.4	169	0.4	169	0.4	169	0.4	169	0.4	169	0.4	169	0.4	169	0.4	168	0.4	169	0.4	169	0.4	169	0.4	169	0.4	169	0.4	169	0.4	169	0.4	169	0.4
TER	TAA	42	1.57	42	1.57	42	1.57	42	1.57	42	1.57	42	1.57	42	1.57	42	1.57	42	1.57	42	1.57	42	1.57	42	1.57	42	1.57	42	1.57	42	1.57	42	1.57	42	1.57	42	1.57	42	1.57	42	1.57	42	1.57	42	1.57	42	1.57	42	1.57
	TAG	21	0.79	21	0.79	21	0.79	21	0.79	21	0.79	21	0.79	21	0.79	21	0.79	21	0.79	21	0.79	21	0.79	21	0.79	21	0.79	21	0.79	21	0.79	21	0.79	21	0.79	21	0.79	21	0.79	21	0.79	21	0.79	21	0.79	21	0.79	21	0.79
His	CAT	402	1.51	402	1.51	402	1.51	403	1.52	402	1.51	402	1.51	402	1.51	402	1.51	402	1.51	402	1.51	402	1.51	402	1.51	402	1.51	402	1.51	402	1.51	402	1.51	402	1.51	402	1.51	402	1.51	402	1.51	402	1.51	402	1.51	402	1.51	402	1.51
	CAC	131	0.49	130	0.49	130	0.49	129	0.48	130	0.49	131	0.49	131	0.49	131	0.49	130	0.49	130	0.49	130	0.49	130	0.49	130	0.49	130	0.49	130	0.49	130	0.49	130	0.49	130	0.49	130	0.49	130	0.49	130	0.49	130	0.49	131	0.49	131	0.49
Gln	CAA	614	1.5	614	1.5	614	1.5	616	1.5	614	1.5	614	1.5	614	1.5	614	1.5	614	1.5	614	1.5	614	1.5	614	1.5	614	1.5	614	1.5	614	1.5	614	1.5	614	1.5	614	1.5	614	1.5	614	1.5	614	1.5	614	1.5	614	1.5	614	1.5
	CAG	204	0.5	204	0.5	204	0.5	205	0.5	204	0.5	204	0.5	204	0.5	204	0.5	204	0.5	204	0.5	204	0.5	204	0.5	204	0.5	204	0.5	204	0.5	204	0.5	204	0.5	204	0.5	204	0.5	204	0.5	204	0.5	204	0.5	204	0.5	204	0.5
Asn	AAT	832	1.53	833	1.53	833	1.53	831	1.53	830	1.53	832	1.53	832	1.53	832	1.53	833	1.53	833	1.53	833	1.53	833	1.53	833	1.53	833	1.53	833	1.53	830	1.53	833	1.53	833	1.53	833	1.53	833	1.53	833	1.53	833	1.53	832	1.53	832	1.53
	AAC	254	0.47	254	0.47	254	0.47	253	0.47	254	0.47	254	0.47	254	0.47	254	0.47	254	0.47	254	0.47	254	0.47	254	0.47	254	0.47	254	0.47	254	0.47	254	0.47	254	0.47	254	0.47	254	0.47	254	0.47	254	0.47	254	0.47	254	0.47	254	0.47
Lys	AAA	907	1.5	907	1.5	907	1.5	908	1.5	906	1.5	907	1.5	907	1.5	907	1.5	907	1.5	907	1.5	907	1.5	907	1.5	907	1.5	907	1.5	907	1.5	906	1.5	907	1.5	907	1.5	907	1.5	907	1.5	907	1.5	907	1.5	907	1.5	907	1.5
	AAG	301	0.5	301	0.5	301	0.5	300	0.5	301	0.5	301	0.5	301	0.5	301	0.5	301	0.5	301	0.5	301	0.5	301	0.5	301	0.5	301	0.5	301	0.5	301	0.5	301	0.5	301	0.5	301	0.5	301	0.5	301	0.5	301	0.5	301	0.5	301	0.5
Asp	GAT	718	1.59	717	1.58	717	1.58	717	1.58	721	1.59	718	1.59	718	1.59	718	1.59	717	1.58	717	1.58	717	1.58	717	1.58	717	1.58	717	1.58	717	1.58	720	1.59	717	1.58	717	1.58	717	1.58	717	1.58	717	1.58	717	1.58	718	1.59	718	1.59
	GAC	187	0.41	188	0.42	188	0.42	188	0.42	188	0.41	187	0.41	187	0.41	187	0.41	188	0.42	188	0.42	188	0.42	188	0.42	188	0.42	188	0.42	188	0.42	188	0.41	188	0.42	188	0.42	188	0.42	188	0.42	188	0.42	188	0.42	187	0.41	187	0.41
Glu	GAA	905	1.5	905	1.5	905	1.5	905	1.5	905	1.5	905	1.5	905	1.5	905	1.5	905	1.5	905	1.5	905	1.5	905	1.5	905	1.5	905	1.5	905	1.5	905	1.5	905	1.5	905	1.5	905	1.5	905	1.5	905	1.5	905	1.5	905	1.5	905	1.5
	GAG	299	0.5	299	0.5	299	0.5	299	0.5	299	0.5	299	0.5	299	0.5	299	0.5	299	0.5	299	0.5	299	0.5	299	0.5	299	0.5	299	0.5	299	0.5	299	0.5	299	0.5	299	0.5	299	0.5	299	0.5	299	0.5	299	0.5	299	0.5	299	0.5
Cys	TGT	192	1.49	192	1.49	192	1.49	191	1.49	191	1.49	192	1.49	192	1.49	192	1.49	192	1.49	192	1.49	192	1.49	192	1.49	192	1.49	192	1.49	192	1.49	191	1.49	192	1.49	192	1.49	192	1.49	192	1.49	192	1.49	192	1.49	192	1.49	192	1.49
	TGC	65	0.51	65	0.51	65	0.51	66	0.51	66	0.51	65	0.51	65	0.51	65	0.51	65	0.51	65	0.51	65	0.51	65	0.51	65	0.51	65	0.51	65	0.51	66	0.51	65	0.51	65	0.51	65	0.51	65	0.51	65	0.51	65	0.51	65	0.51	65	0.51
TER	TGA	17	0.64	17	0.64	17	0.64	17	0.64	17	0.64	17	0.64	17	0.64	17	0.64	17	0.64	17	0.64	17	0.64	17	0.64	17	0.64	17	0.64	17	0.64	17	0.64	17	0.64	17	0.64	17	0.64	17	0.64	17	0.64	17	0.64	17	0.64	17	0.64
Trp	TGG	424	1	424	1	424	1	423	1	424	1	424	1	424	1	424	1	424	1	424	1	424	1	424	1	424	1	424	1	424	1	424	1	424	1	424	1	424	1	424	1	424	1	424	1	424	1	424	1
Arg	CGT	301	1.32	301	1.32	301	1.32	304	1.33	301	1.32	301	1.32	301	1.32	301	1.32	301	1.32	301	1.32	301	1.32	301	1.32	301	1.32	301	1.32	301	1.32	301	1.32	301	1.32	301	1.32	301	1.32	301	1.32	301	1.32	301	1.32	301	1.32	301	1.32
	CGC	89	0.39	89	0.39	89	0.39	87	0.38	89	0.39	89	0.39	89	0.39	89	0.39	89	0.39	89	0.39	89	0.39	89	0.39	89	0.39	89	0.39	89	0.39	89	0.39	89	0.39	89	0.39	89	0.39	89	0.39	89	0.39	89	0.39	89	0.39	89	0.39
	CGA	341	1.49	341	1.49	341	1.49	343	1.5	341	1.49	341	1.49	341	1.49	341	1.49	341	1.49	341	1.49	341	1.49	341	1.49	341	1.49	341	1.49	341	1.49	341	1.49	341	1.49	341	1.49	341	1.49	341	1.49	341	1.49	341	1.49	341	1.49	341	1.49
	CGG	95	0.42	95	0.42	95	0.42	93	0.41	95	0.42	95	0.42	95	0.42	95	0.42	95	0.42	95	0.42	95	0.42	95	0.42	95	0.42	95	0.42	95	0.42	95	0.42	95	0.42	95	0.42	95	0.42	95	0.42	95	0.42	95	0.42	95	0.42	95	0.42
Ser	AGT	359	1.25	359	1.25	359	1.25	362	1.26	358	1.25	359	1.25	359	1.25	359	1.25	359	1.25	359	1.25	359	1.25	359	1.25	359	1.25	359	1.25	359	1.25	358	1.25	359	1.25	359	1.25	359	1.25	359	1.25	359	1.25	359	1.25	359	1.25	359	1.25
	AGC	99	0.34	99	0.34	99	0.34	100	0.35	99	0.34	99	0.34	99	0.34	99	0.34	99	0.34	99	0.34	99	0.34	99	0.34	99	0.34	99	0.34	99	0.34	99	0.35	99	0.34	99	0.34	99	0.34	99	0.34	99	0.34	99	0.34	99	0.34	99	0.34
Arg	AGA	397	1.74	397	1.74	397	1.74	396	1.74	398	1.74	397	1.74	397	1.74	397	1.74	397	1.74	397	1.74	397	1.74	397	1.74	397	1.74	397	1.74	397	1.74	398	1.74	397	1.74	397	1.74	397	1.74	397	1.74	397	1.74	397	1.74	397	1.74	397	1.74
	AGG	146	0.64	146	0.64	146	0.64	145	0.64	146	0.64	146	0.64	146	0.64	146	0.64	146	0.64	146	0.64	146	0.64	146	0.64	146	0.64	146	0.64	146	0.64	146	0.64	146	0.64	146	0.64	146	0.64	146	0.64	146	0.64	146	0.64	146	0.64	146	0.64
Gly	GGT	519	1.29	519	1.29	519	1.29	519	1.29	519	1.29	519	1.29	519	1.29	519	1.29	519	1.29	519	1.29	519	1.29	519	1.29	519	1.29	519	1.29	519	1.29	521	1.29	519	1.29	519	1.29	519	1.29	519	1.29	519	1.29	519	1.29	519	1.29	519	1.29
	GGC	186	0.46	186	0.46	186	0.46	185	0.46	186	0.46	186	0.46	186	0.46	186	0.46	186	0.46	186	0.46	186	0.46	186	0.46	186	0.46	186	0.46	186	0.46	186	0.46	186	0.46	186	0.46	186	0.46	186	0.46	186	0.46	186	0.46	186	0.46	186	0.46
	GGA	627	1.56	627	1.56	627	1.56	628	1.56	627	1.56	627	1.56	627	1.56	627	1.56	627	1.56	627	1.56	627	1.56	627	1.56	627	1.56	627	1.56	627	1.56	626	1.55	627	1.56	627	1.56	627	1.56	627	1.56	627	1.56	627	1.56	627	1.56	627	1.56
	GGG	279	0.69	279	0.69	279	0.69	279	0.69	279	0.69	279	0.69	279	0.69	279	0.69	279	0.69	279	0.69	279	0.69	279	0.69	279	0.69	279	0.69	279	0.69	279	0.69	279	0.69	279	0.69	279	0.69	279	0.69	279	0.69	279	0.69	279	0.69	279	0.69
	Total	23013	64.02	23013	64.03	23013	64.03	23016	64.02	23013	63.99	23013	64.02	23013	64.02	23013	64.02	23013	64.03	23013	64.03	23013	64.03	23013	64.03	23013	64.03	23013	64.03	23013	64.03	23010	64.01	23013	64.03	23013	64.03	23013	64.03	23013	64.03	23013	64.03	23013	64.03	23013	64.02	23013	64.02
Total number of amino acid		22933		22933		22933		22936		22933		22933		22933		22933		22933		22933		22933		22933		22933		22933		22933		22930		22933		22933		22933		22933		22933		22933		22933		22933
[truncated: 10 more columns]
